# Supplementary material
Source: Research Square preprint supplement (doi:10.21203/rs.3.rs-8872331/v1)
Supplement: Supplementary file 1 [file e48bd04dc09d23ef05bb11e8.docx]

**Questionnaire sent to respondents**

**Part I: General information**

1. Gender: 1. Male
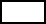
 2. Female
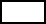

2. What is your age in year?
3. What is your highest level of education? **i**. Diploma
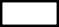
 **ii**. B Pharm degree
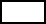

   1. iii. MSc/MA
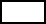
 **iv**. Others; please specify it
4. Type of Health Facility 1.Hospital
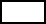
 2.Health Center
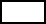

5. What is your working experience at this facility (in years)?
6. In which unit/departments currently working?
7. What is your work experiences at your current position (in years)?

**Part II: Pharmaceutical Supply Chain Related Risks in the Facility**

For the following questions Lickert’s scale is used to rate the level of PSC Risks in your health facility. Accordingly, please indicate the degree to which you agree to the following statements: **1 = Strongly Disagree, 2=Disagree, 3 = Neutral, 4 =Agree, 5 =Strongly Agree**

| **Pharmaceutical Supply Chain Risks** | **Code for**  **Item** | **Measurement of Item** | **1** | **2** | **3** | **4** | **5** |
| --- | --- | --- | --- | --- | --- | --- | --- |
| **Demand side Risks** | DR-1 | Customers Unanticipated or very volatile demand |  |  |  |  |  |
| DR-2 | Insufficient or distorted information, orders or purchase requests or specifications from internal customers |  |  |  |  |  |
| DR-3 | Risks in forecasting (Lead times, product variety, short life cycles, information distortion, exaggeration of demand, etc.) |  |  |  |  |  |
| DR-4 | Your customers place orders Consistent with your nominated product specifications |  |  |  |  |  |

| **Supply Side Risks** | SR-1 | Poor logistics performance of suppliers(e.g. Delivery, dependability) |  |  |  |  |  |
| --- | --- | --- | --- | --- | --- | --- | --- |
| SR-2 | Dependency on key suppliers |  |  |  |  |  |
| SR-3 | Poor communication with the Suppliers |  |  |  |  |  |
| SR-4 | Poor Partnership/coordination with supplier |  |  |  |  |  |
| SR-5 | Supplier quality problems |  |  |  |  |  |
| SR-6 | Poor logistics performance of logistics service provider |  |  |  |  |  |
| SR-7 | Increase in product prices by supplier, Product expiration on shelves |  |  |  |  |  |
| SR-8 | Capacity fluctuations or shortages on the supply markets(Non- Availability of resources) |  |  |  |  |  |
| **Regulatory and legal Risks** | RLBR-1 | Changes in the political environment due the  Introduction of new laws |  |  |  |  |  |
| RLBR-2 | Administrative barriers to the setup or operation of Supply chains |  |  |  |  |  |
| **Infrastructure Risks(Information Risk, transport Financial risks)** | IR-1 | Loss of own operation facility due to local disruptions((e.g.,fire, strike) |  |  |  |  |  |
| IR-2 | Breakdown of internal IT infrastructure and systems |  |  |  |  |  |
| IR-3 | Loss of own function capacity due to technical reasons |  |  |  |  |  |

|  | IR-4 | Breakdown of external IT Infrastructure |  |  |  |  |  |
| --- | --- | --- | --- | --- | --- | --- | --- |
| IR-5 | Lack of proper storage area with adequate facilities |  |  |  |  |  |
| IR-6 | Infrastructure unavailability (water, electricity IT, vehicle, road, Equipment, etc.). |  |  |  |  |  |
| IR-7 | Disruptions in the supply of electricity, water, etc. |  |  |  |  |  |
| IR-8 | Lack of information transparency between logistics and marketing |  |  |  |  |  |
| IR-9 | Paperwork and scheduling |  |  |  |  |  |
| **Macro/Catastrophic c risks** | CR-1 | Political instability, war, civil unrest or other sociopolitical Crises. |  |  |  |  |  |
| CR-2 | Diseases or epidemics |  |  |  |  |  |
| CR-3 | Natural disasters |  |  |  |  |  |
| **Financial-related risks** | FR-1 | Dynamic foreign exchange rates |  |  |  |  |  |
| FR-2 | Bank interest rate fluctuation |  |  |  |  |  |
| FR-3 | Financial restriction |  |  |  |  |  |
| FR-4 | Increased in freight charges |  |  |  |  |  |

**Part III: Pharmaceutical Supply Chain Risk Management Practices**

For the following questions Lickert’s scale is used to rate the level of SCRM practices in your health facility. Accordingly, please indicate the degree to which you agree to the following statements: **1 = Strongly Disagree, 2=Disagree, 3 = Neutral, 4 =Agree, 5 =Strongly Agree**

| **SCRM Components** | **Code for**  **Item** | **Measurement of Item** | **1** | **2** | **3** | **4** | **5** |
| --- | --- | --- | --- | --- | --- | --- | --- |

| **Risk Identification** | RI-1 | Facility uses a standard process for identifying  supply chain risks |  |  |  |  |  |
| --- | --- | --- | --- | --- | --- | --- | --- |
| RI-2 | Supply chain risks are identified by thei  Frequency of Occurrence |  |  |  |  |  |
| RI-3 | All potential supply chain risks are communicated to all parties. |  |  |  |  |  |
| RI-4 | The facility record identified risks using risk matrix as a tool |  |  |  |  |  |
| RI-5 | The facility uses past lesson for identifying risks |  |  |  |  |  |
| **Risk Analysis** | RA-1 | The facility prioritize its main supply chain risks |  |  |  |  |  |
| RA-2 | Facility follows standard procedures for supply chain risk analysis |  |  |  |  |  |
| RA-3 | The level of supply chain risk analysis practice is appropriate for identified risks |  |  |  |  |  |
| RA-4 | Identified risks are quantified and, analyzed based on the severity of the hazard, the likelihood of occurrence, and detection by the facility |  |  |  |  |  |

|  | RA-5 | The facility emphasizes the Significance of reviewing the continuous evaluation process. |  |  |  |  |  |
| --- | --- | --- | --- | --- | --- | --- | --- |
| RA-6 | The facility currently has procedures in place to evaluate supply chain risk and adjust policies accordingly |  |  |  |  |  |
| RA-7 | The facility follows supply chain risk  Evaluation procedures correctly |  |  |  |  |  |
| **Risk Treatment** |  |  |  |  |  |  |  |
| RT-1 | In the facility, the best risk management strategy is Avoidance. |  |  |  |  |  |

|  | RT-2 | There is continuous training on risk Management |  |  |  |  |  |
| --- | --- | --- | --- | --- | --- | --- | --- |
| RT-3 | There are framework contracts in place with suppliers |  |  |  |  |  |
| RT-4 | The contract management system for risk control has been improved |  |  |  |  |  |
| RT-5 | Supplies insurance is used to manage risks |  |  |  |  |  |
| RT-6 | There is Postponement method used in supply chain flexibility |  |  |  |  |  |
| **Risk Monitoring** |  | | | | | | |
| RM-1 | The facility conduct formal cross-departmental risk reviews quarterly |  |  |  |  |  |
| RM-2 | Risk monitoring checklists are consistently used for all major departments |  |  |  |  |  |
| RM-3 | Lessons from past risk incidents are systematically incorporated into updated monitoring procedures |  |  |  |  |  |
| RM-4 | The facility takes corrective actions promptly when risks exceed acceptable levels |  |  |  |  |  |

**Part IV: SC Resilience Indicators**

For the following questions Lickert’s scale is used to rate the level of Supply Chain Resilience practices in your health facility. Accordingly, please indicate the degree to which you agree to the following statements: **1 = Strongly Disagree, 2=Disagree, 3 = Neutral, 4 =Agree, 5**

**=Strongly Agree**

| **Resilience Metrics** | **Code for Item** | **Measurement Item** | **1** | **2** | **3** | **4** | **5** |
| --- | --- | --- | --- | --- | --- | --- | --- |
| Flexibility | SRF1 | The facility exhibits ability to quickly adapt internal operations to fulfill a wide variety of patient medicine orders. |  |  |  |  |  |
| SRF2 | The facility offer a diverse range of medical products and can customize them to meet specific patient needs |  |  |  |  |  |

|  | SRF3 | The time required switching procurement from one medical product to another is minimal in the facility |  |  |  |  |  |
| --- | --- | --- | --- | --- | --- | --- | --- |
| Visibility | SRV1 | A high proportion of the shipments can be tracked in real-time |  |  |  |  |  |
| SRV2 | The information shared across our supply chain is accurate and reliable |  |  |  |  |  |
| SRV3 | Issues within the facility’s supply chain are identified and addressed promptly |  |  |  |  |  |
| Adaptability | SRA1 | Supply chain reacts quickly to changes in patient demand or market conditions |  |  |  |  |  |
| SRA2 | Frequently introduce new medical products or improvements to our offerings |  |  |  |  |  |
| SRA3 | Facility’s supply chain is well-prepared for various future scenarios and challenges |  |  |  |  |  |
| Redundancy | SRR1 | The facility have a sufficient number of backup suppliers for critical medical components |  |  |  |  |  |
| SRR2 | The facility maintains an adequate amount of safety stock to buffer against demand variability |  |  |  |  |  |
| SRR3 | The facility have alternative transportation routes and facilities in place to ensure continuity of operations |  |  |  |  |  |
| Robustness | SRB1 | Suppliers consistently meet quality and delivery standards |  |  |  |  |  |
| SRB2 | Existing contingency plans are effective and Comprehensive |  |  |  |  |  |
| SRB3 | The safety stock we maintain is adequate to withstand potential disruptions |  |  |  |  |  |

| Agility | SAR1 | The supply chain exhibits rapid response capability to adjust logistics and distribution based on shifting patient demand patterns |  |  |  |  |  |
| --- | --- | --- | --- | --- | --- | --- | --- |
| SAR2 | The facility can change order quantities and specifications without significant delays |  |  |  |  |  |
| SAR3 | The facility reduces variations in lead time significantly that affect the overall performance and responsiveness |  |  |  |  |  |
| Collaboration | SRC1 | Data is exchanged frequently between the facility and supply chain partners |  |  |  |  |  |
| SRC2 | Collaborative forecasting and planning efforts with partners are effective |  |  |  |  |  |
| SRC3 | There is a high level of trust and effective communication among the supply chain Partners |  |  |  |  |  |

**Thank you once again for your generous participation in this survey!**

**Part V: In -depth face to face Semi- structured interview questions/guides**

1. What specific risks do you encounter in the pharmaceutical supply chain? Could you provide examples of past disruptions or challenges faced, such as shortages or delays?
2. In the event of a supply chain disruption, what strategies does your facility have in place to respond? Can you provide an example of how your facility successfully navigated a past disruption? Among these, which is used most commonly? Why?
3. Do you think that implementing effective supply chain risk management practices in PSC supply chain practices can result in overall resilience? How? How would you rate your facility in this regard?
4. What are the challenges to implement SCRM practices in your facility? What are your suggestions to overcome these challenges?

**Thank you very much for your participation in this interview!!**
